# Supplementary material for: The Portal Venous Pulsatility Index and Main Portal Vein Diameter as Surrogate Markers for Liver Fibrosis in Nonalcoholic Fatty Liver Disease and Metabolic-Dysfunction-Associated Steatotic Liver Disease
Source: MDPI journal article supplement (doi:10.3390/diagnostics14040393), 2024-02-11
Supplement: s1 [file s1]

## Supplementary Materials

**Table S1.** Baseline characteristics of patients with age over 30.

|                          | Total ( <i>n</i> = 184) | SF (–) Group ( <i>n</i> = 171) | SF (+) Group ( <i>n</i> = 13) | <i>p</i> Value |
|--------------------------|-------------------------|--------------------------------|-------------------------------|----------------|
| Male sex                 | 178 (96.7)              | 165 (96.5)                     | 13 (100.0)                    | 1.000          |
| Age                      | 40.0 (35.0, 44.0)       | 40.0 (35.0, 44.0)              | 39.0 (34.0, 42.0)             | 0.260          |
| Height (cm)              | 174.2 ± 5.7             | 174.2 ± 5.7                    | 174.0 ± 6.4                   | 0.907          |
| Weight (kg)              | 83.4 ± 13.0             | 82.2 ± 12.2                    | 99.0 ± 13.0                   | <0.001         |
| BMI (kg/m <sup>2</sup> ) | 27.4 ± 3.7              | 27.0 ± 3.3                     | 32.7 ± 4.3                    | <0.001         |
| DM                       | 26 (14.1)               | 24 (14.0)                      | 2 (15.4)                      | 1.000          |
| HTN                      | 64 (34.8)               | 60 (35.1)                      | 4 (30.8)                      | 0.990          |
| Dyslipidemia             | 115 (62.5)              | 106 (62.0)                     | 9 (69.2)                      | 0.824          |
| PLT (1000/μL)            | 260.0 (225.0, 294.2)    | 260.0 (225.0, 296.0)           | 257.0 (225.0, 278.0)          | 0.808          |
| AST (IU/L)               | 29.0 (22.9, 37.1)       | 28.8 (22.1, 36.2)              | 51.0 (27.4, 62.0)             | 0.003          |
| ALT (IU/L)               | 42.0 (29.8, 66.3)       | 41.0 (28.5, 64.0)              | 84.0 (61.0, 110.0)            | <0.001         |
| TB (mg/dL)               | 0.8 (0.6, 1.0)          | 0.8 (0.6, 1.1)                 | 0.8 (0.7, 0.9)                | 0.308          |
| GGT (U/L)                | 60.0 (35.0, 102.0)      | 58.0 (34.0, 97.0)              | 99.0 (65.0, 117.8)            | 0.053          |
| Albumin (mg/dL)          | 4.8 (4.7, 5.0)          | 4.8 (4.7, 5.0)                 | 4.7 (4.6, 4.9)                | 0.276          |
| PT (INR)                 | 0.98 (0.94, 1.01)       | 0.98 (0.94, 1.01)              | 0.96 (0.94, 0.97)             | 0.081          |
| CAP (dB/m)               | 290.0 (245.8, 332.0)    | 281.0 (244.0, 326.5)           | 356.0 (327.0, 367.0)          | <0.001         |
| LSM (kPa)                | 4.6 (4.0, 5.7)          | 4.5 (4.0, 5.3)                 | 9.0 (8.7, 11.6)               | <0.001         |

Values are presented as mean ± standard deviation, median (interquartile range), or number (%). NAFLD was stratified by using liver stiffness measurement with the threshold of 8.2kPa. Abbreviations: ALT, alanine aminotransferase; AST, aspartate aminotransferase; BMI, body mass index; CAP, controlled attenuation parameter; DM, diabetes mellitus; GGT, gamma-glutamyl transferase; HTN, hypertension; INR, international normalized ratio; LSM, liver stiffness measurement; NAFLD, nonalcoholic fatty liver disease; PLT, platelet count; PT, prothrombin time; TB, total bilirubin.

**Table S2.** Factors associated with significant fibrosis in patients with age over 30.

|                          | Crude OR (95% CI)   | <i>p</i> |
|--------------------------|---------------------|----------|
| VPI (0.01 scale)         | 0.822 (0.721–0.938) | 0.004    |
| MPVD                     | 2.233 (1.391–3.585) | <0.001   |
| BMI (kg/m <sup>2</sup> ) | 1.591 (1.300–1.949) | <0.001   |
| DM                       | 1.114 (0.232–5.338) | 0.893    |
| Dyslipidemia             | 1.380 (0.408–4.662) | 0.604    |
| HTN                      | 0.822 (0.243–2.782) | 0.753    |

Abbreviations: BMI, body mass index; DM, diabetes mellitus; HTN, hypertension; MPVD, main portal vein diameter; OR, odds ratio; VPI, portal venous pulsatility index.

**Table S3.** Sensitivity analysis using different determinant values for significant fibrosis.

|                                                                                |                            | Crude OR (95% CI)     | <i>p</i> | Age-Adjusted OR (95% CI) | <i>p</i> | Multivariate-Adjusted OR (95% CI) | <i>p</i> |
|--------------------------------------------------------------------------------|----------------------------|-----------------------|----------|--------------------------|----------|-----------------------------------|----------|
| <b>FAST score 0.67</b><br>SF (–) ( <i>n</i> = 939) vs. SF (+) ( <i>n</i> = 55) | VPI (0.01 scale)           | 0.905 (0.868–0.942)   | <0.001   | 0.885 (0.846–0.925)      | <0.001   | 0.916 (0.874–0.960)               | 0.002    |
|                                                                                | MPVD                       | 1.806 (1.501–2.172)   | <0.001   | 1.811 (1.506–2.177)      | <0.001   | 1.578 (1.296–1.920)               | <0.001   |
|                                                                                | BMI ≥ 30 kg/m <sup>2</sup> | 8.462 (4.589–15.606)  | <0.001   | 8.216 (4.449–15.172)     | <0.001   |                                   |          |
|                                                                                | Age                        | 0.957 (0.913–1.002)   | 0.063    | -                        | -        | -                                 | -        |
|                                                                                | DM                         | 1.264 (0.379–4.217)   | 0.704    | -                        | -        | -                                 | -        |
|                                                                                | Dyslipidemia               | 2.902 (1.664–5.060)   | <0.001   | 3.657 (2.069–6.463)      | <0.001   | 2.461 (1.355–4.469)               | 0.003    |
|                                                                                | HTN                        | 0.904 (0.434–1.884)   | 0.789    | -                        | -        | -                                 | -        |
| <b>LSM 7.0</b><br>SF (–) ( <i>n</i> = 871) vs. SF (+) ( <i>n</i> = 123)        | VPI (0.01 scale)           | 0.925 (0.902–0.949)   | <0.001   | 0.914 (0.889–0.939)      | <0.001   | 0.949 (0.922–0.977)               | <0.001   |
|                                                                                | MPVD                       | 1.924 (1.657–2.235)   | <0.001   | 1.931 (1.662–2.243)      | <0.001   | 1.706 (1.451–2.007)               | <0.001   |
|                                                                                | BMI ≥ 30 kg/m <sup>2</sup> | 10.337 (6.735–15.864) | <0.001   | 10.250 (6.674–15.743)    | <0.001   |                                   |          |
|                                                                                | Age                        | 0.983 (0.957–1.009)   | 0.188    | -                        | -        | -                                 | -        |
|                                                                                | DM                         | 1.360 (0.593–3.122)   | 0.468    | -                        | -        | -                                 | -        |
|                                                                                | Dyslipidemia               | 1.387 (0.945–2.036)   | 0.095    | 1.547 (1.039–2.306)      | 0.032    | 0.884 (0.566–1.381)               | 0.588    |
|                                                                                | HTN                        | 1.288 (0.807–2.056)   | 0.288    | -                        | -        | -                                 | -        |

Multivariate model: BMI ≥ 30 kg/m<sup>2</sup> and age were adjusted as covariates. Abbreviations: BMI, body mass index; DM, diabetes mellitus; FAST, Fibroscan-AST; HTN, hypertension; LSM, liver stiffness measurement; MPVD, main portal vein diameter; OR, odds ratio; VPI, portal venous pulsatility index.

**Table S4.** Factors associated with significant fibrosis in MASLD patients ( $n = 939$ ).

|                            | Crude OR (95% CI)     | <i>p</i> | Age-Adjusted OR (95% CI) | <i>p</i> | Multivariate-Adjusted OR (95% CI) | <i>p</i> |
|----------------------------|-----------------------|----------|--------------------------|----------|-----------------------------------|----------|
| VPI (0.01 scale)           | 0.924 (0.893–0.956)   | <0.001   | 0.914 (0.881–0.948)      | <0.001   | 0.951 (0.924–0.979)               | 0.001    |
| MPVD                       | 1.743 (1.467–2.071)   | <0.001   | 1.742 (1.467–2.069)      | <0.001   | 1.687 (1.435–1.984)               | <0.001   |
| BMI (kg/m <sup>2</sup> )   | 1.381 (1.288–1.479)   | <0.001   | 1.385 (1.291–1.485)      | <0.001   | -                                 | -        |
| BMI ≥ 30 kg/m <sup>2</sup> | 14.781 (7.775–28.103) | <0.001   | 14.853 (7.796–28.298)    | <0.001   | -                                 | -        |
| Age                        | 0.989 (0.960–1.024)   | 0.529    | -                        | -        | -                                 | -        |
| DM                         | 2.121 (0.863–5.212)   | 0.101    | 2.484 (0.964–6.400)      | 0.060    | 1.002 (0.397–2.528)               | 0.996    |
| Dyslipidemia               | 1.523 (0.928–2.500)   | 0.096    | 1.655 (0.990–2.765)      | 0.055    | 0.854 (0.548–1.331)               | 0.487    |
| HTN                        | 0.924 (0.484–1.763)   | 0.810    | -                        | -        | -                                 | -        |

Multivariate model: BMI≥30kg/m<sup>2</sup> and age were adjusted as covariates. Abbreviations: BMI, body mass index; DM, diabetes mellitus; HTN, hypertension; MPVD, main portal vein diameter; OR, odds ratio; VPI, portal venous pulsatility index.

**Table S5.** Comparison of baseline characteristics between train and test cohorts.

|                          | Training Cohort ( $n = 662$ ) | Test Cohort ( $n = 332$ ) | <i>p</i> Value |
|--------------------------|-------------------------------|---------------------------|----------------|
| Male sex                 | 652 (98.5)                    | 322 (97.0)                | 0.177          |
| Age                      | 21.0 (20.0, 26.0)             | 21.0 (20.0, 24.3)         | 0.119          |
| Height (cm)              | 174.6 ± 5.8                   | 174.6 ± 6.0               | 0.980          |
| Weight (kg)              | 83.9 ± 14.8                   | 83.5 ± 15.4               | 0.676          |
| BMI (kg/m <sup>2</sup> ) | 27.5 ± 4.3                    | 27.3 ± 4.4                | 0.625          |
| DM                       | 33 (5.0)                      | 11 (3.3)                  | 0.296          |
| HTN                      | 131 (19.8)                    | 45 (13.6)                 | 0.019          |
| Dyslipidemia             | 239 (36.1)                    | 114 (34.3)                | 0.632          |
| PLT (1000/μL)            | 267.0 (234.0, 305.0)          | 264.5 (232.0, 292.0)      | 0.521          |
| AST (IU/L)               | 28.5 (20.4, 40.0)             | 28.8 (21.2, 43.6)         | 0.965          |
| ALT (IU/L)               | 45.5 (23.0, 81.0)             | 50.0 (25.0, 87.0)         | 0.936          |
| TB (mg/dL)               | 0.8 (0.6, 1.0)                | 0.8 (0.7, 1.0)            | 0.718          |
| GGT (U/L)                | 40.0 (23.0, 70.5)             | 40.0 (22.0, 68.0)         | 0.879          |
| Albumin (mg/dL)          | 4.9 (4.7, 5.1)                | 4.9 (4.7, 5.1)            | 0.879          |
| PT (INR)                 | 1.01 (0.97, 1.05)             | 1.01 (0.97, 1.05)         | 0.950          |
| CAP (dB/m)               | 276.0 (242.2, 329.0)          | 280.0 (241.5, 332.0)      | 0.588          |
| LSM (kPa)                | 4.8 (4.0, 6.0)                | 4.8 (4.0, 5.8)            | 0.541          |

Values are presented as mean ± standard deviation, median (interquartile range), or number (%). Abbreviations: ALT, alanine aminotransferase; AST, aspartate aminotransferase; BMI, body mass index; CAP, controlled attenuation parameter; DM, diabetes mellitus; GGT, gamma-glutamyl transferase; HTN, hypertension; INR, international normalized ratio; LSM, liver stiffness measurement; NAFLD, nonalcoholic fatty liver disease; PLT, platelet count; PT, prothrombin time; TB, total bilirubin.

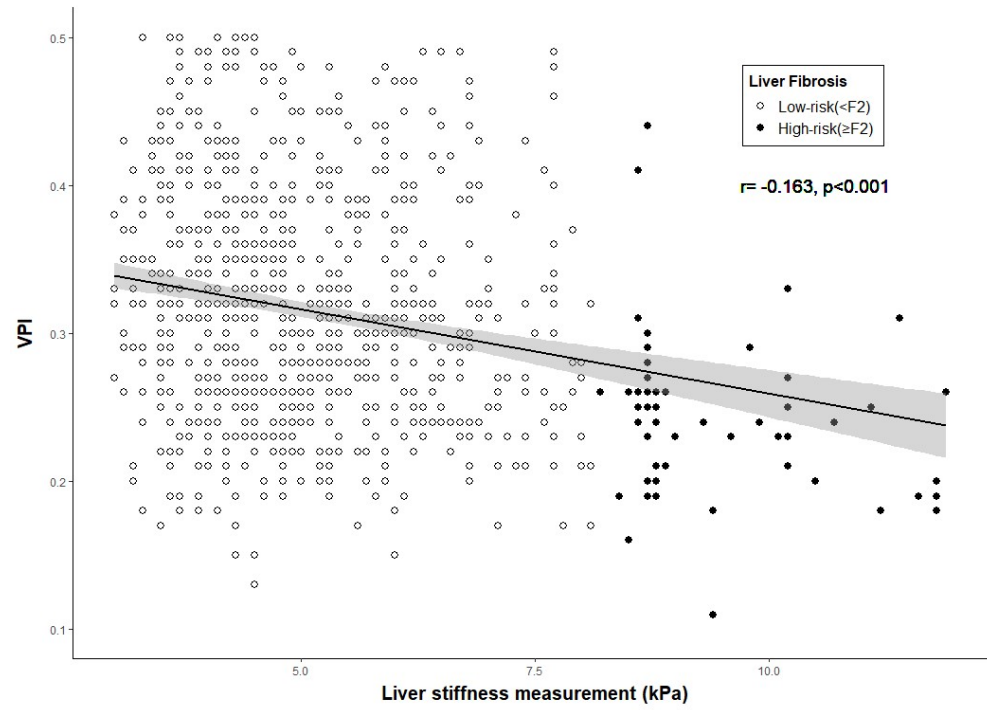

(A)

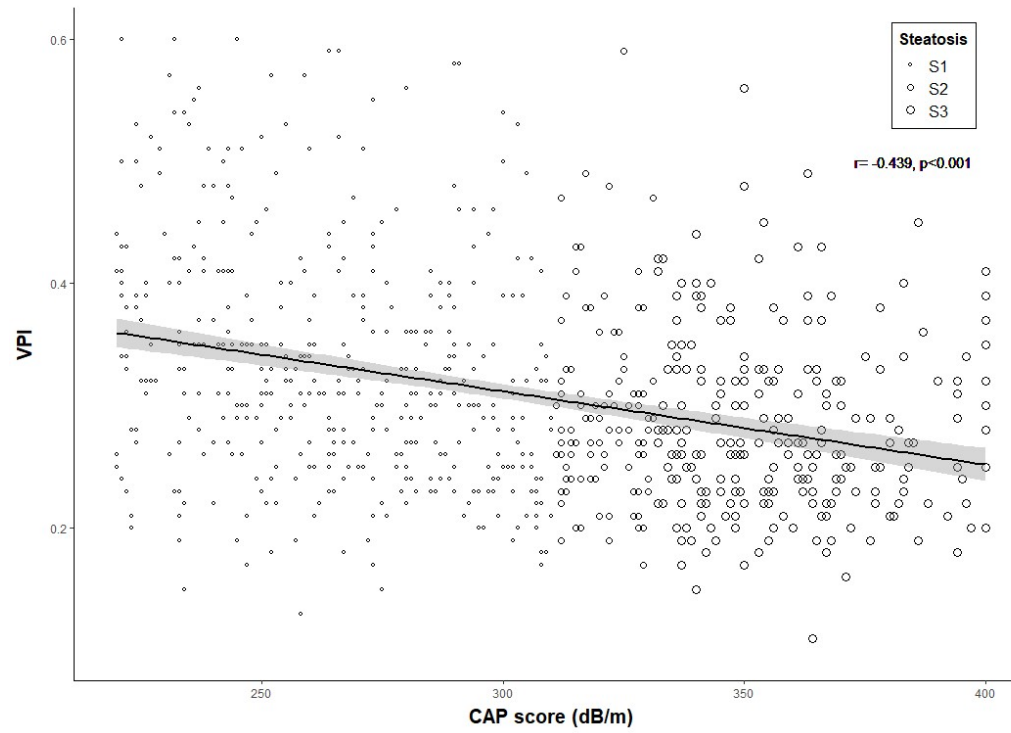

(B)

**Figure S1.** Scatter plot and linear regression line demonstrating correlation between VPI and CAP or LSM (A) VPI and LSM. (B) VPI and CAP. Abbreviations: CAP, controlled attenuation parameter; LSM, liver stiffness measurement; VPI, portal venous pulsatility index.

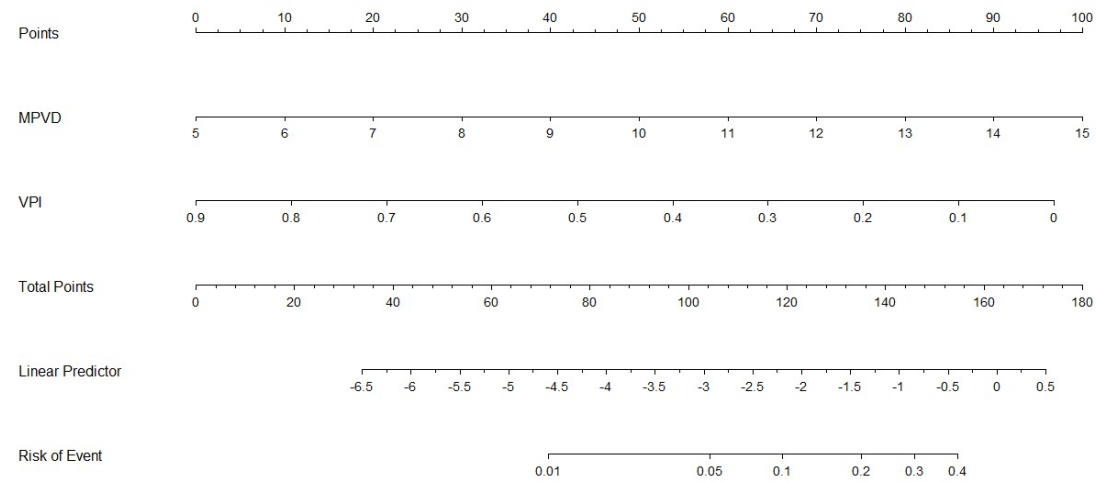

**Figure S2.** Nomogram for predicting significant fibrosis. Abbreviations: MPVD, main portal vein diameter; VPI, portal venous pulsatility index.
